# Supplementary material for: Trash to treasure: converting plastic waste into a useful graphene foil
Source: Royal Society of Chemistry journal article supplement (doi:10.1039/c7nr03580b), 2017-01-01
Supplement: c7nr03580b1.pdf [file c7nr03580b1.pdf]

## Supplementary Information

### Trash to treasure: converting plastic waste into useful graphene foil

*Linfan Cui, Xiaopeng Wang, Nan Chen\*, Bingxue Ji, and Liangti Qu\**

Beijing Key Laboratory of Photoelectric/Electrophotonic Conversion Materials, Key Laboratory of Cluster Science, Ministry of Education of China, School of chemistry and chemical engineering, Beijing Institute of Technology, Beijing 100081, P. R. China.

\* Email: gabechain@bit.edu.cn; lqu@bit.edu.cn.

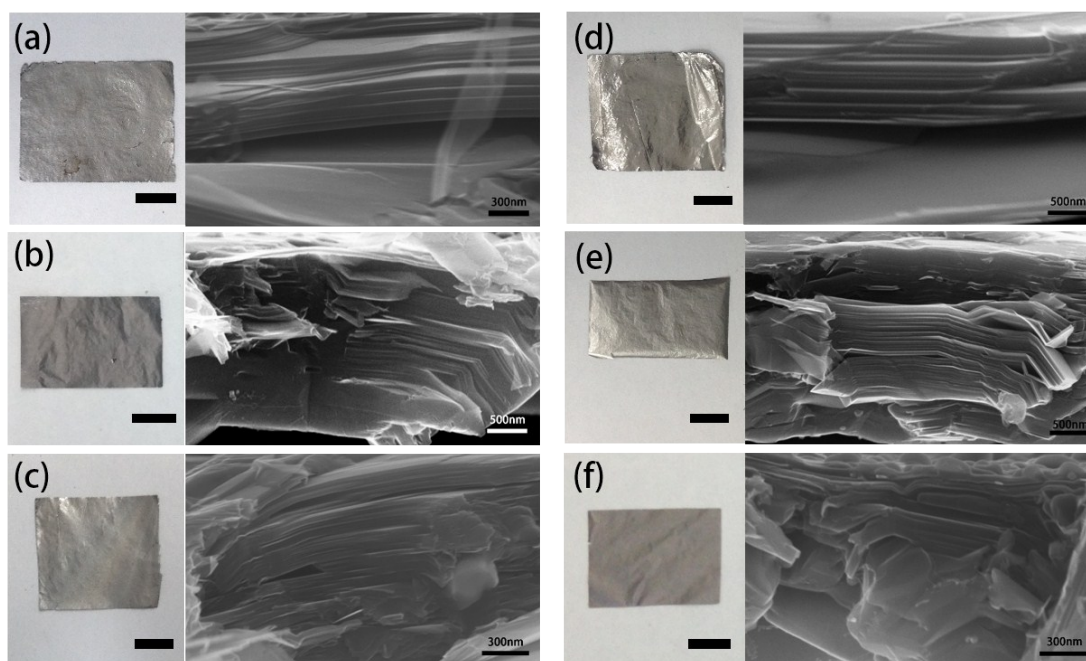

**Fig. S1.** Photos and SEM images of the GFs with different carbon sources. (a) PET. (b) PE. (c) PVC. (d) PP. (e) PS. (f) PMMA. Scale bar is 1 cm.

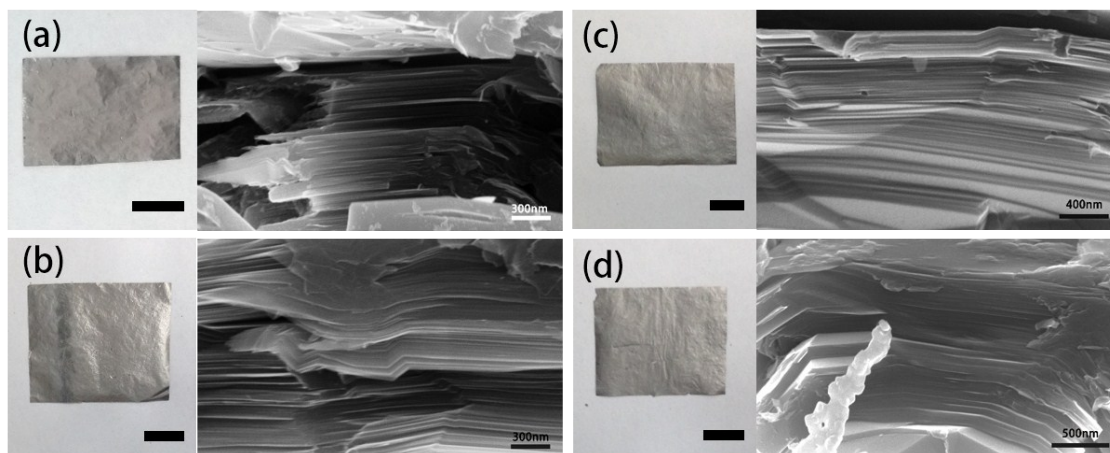

**Fig. S2.** Photos and SEM images of the GFs with different PE plastics as carbon sources. (a) PE (valve bag). (b) PE (clean agent bottle). (c) PE (preservative film). (d) PE (plastic bag). Scale bar is 1 cm.

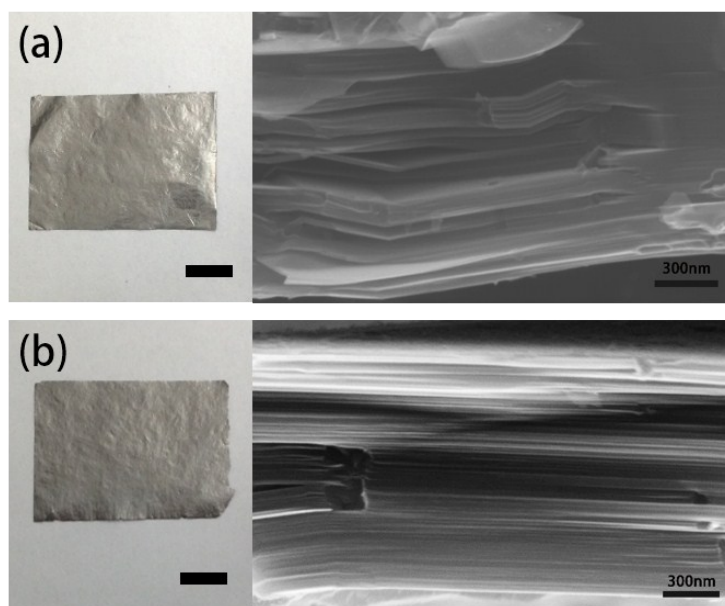

**Fig. S3.** Photos and SEM images of the GFs with different PP plastics as carbon sources. (a) PP (plastic bag). (b) PP (lunch box). Scale bar is 1 cm.

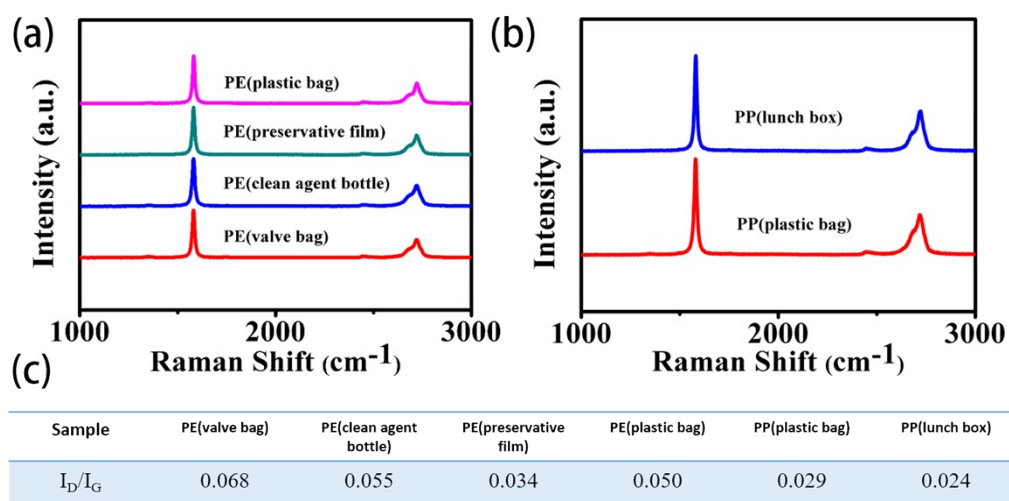

**Fig. S4.** Raman spectra of the GF synthesized with different (a) PE plastic materials. (b) PP plastic materials. (c) The ratio of D band to G band of different plastic materials.

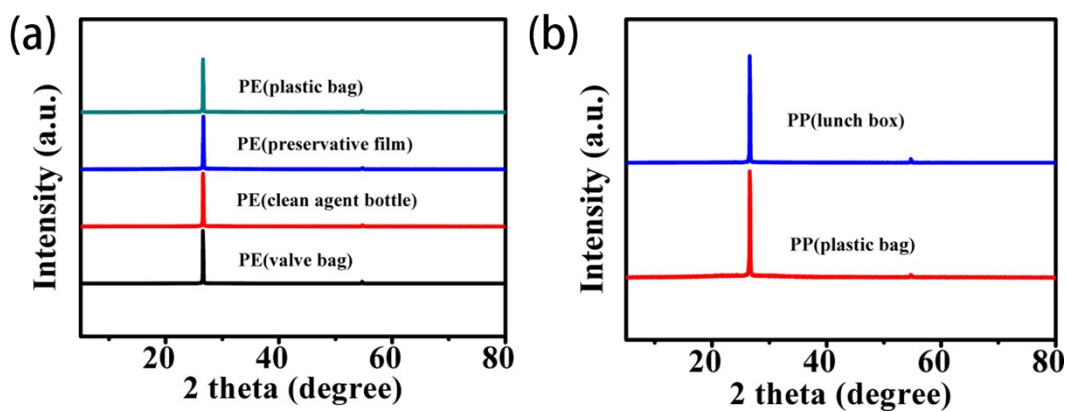

**Fig. S5.** XRD spectra of the GF synthesized with different (a) PE plastic materials. (b) PP plastic materials.

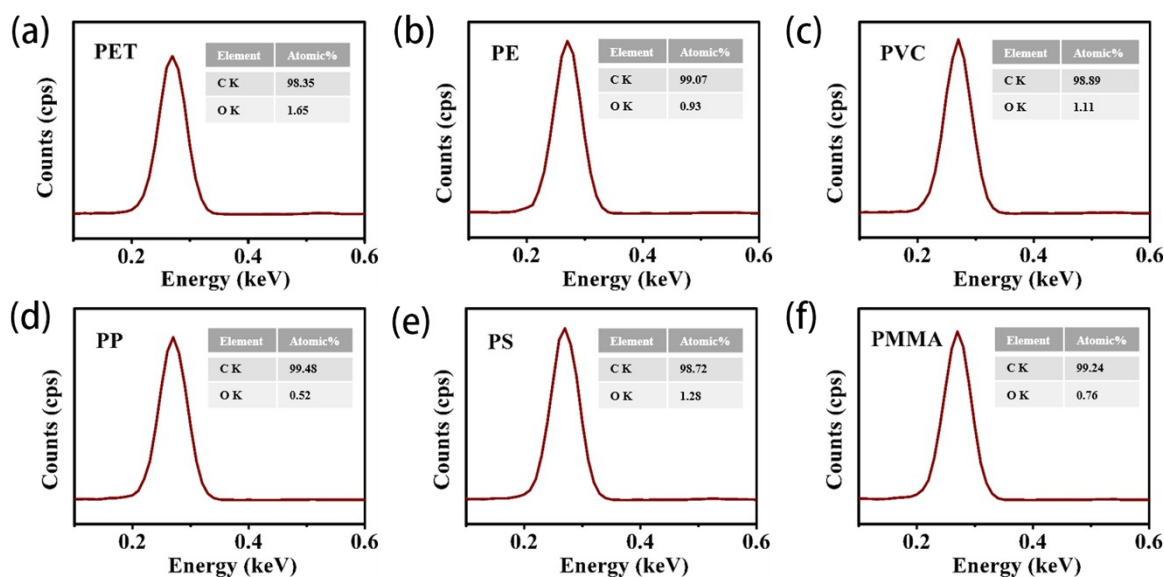

**Fig. S6.** EDS spectra of the GFs with different carbon sources. (a) PET. (b) PE. (c) PVC. (d) PP. (e) PS. (f) PMMA.

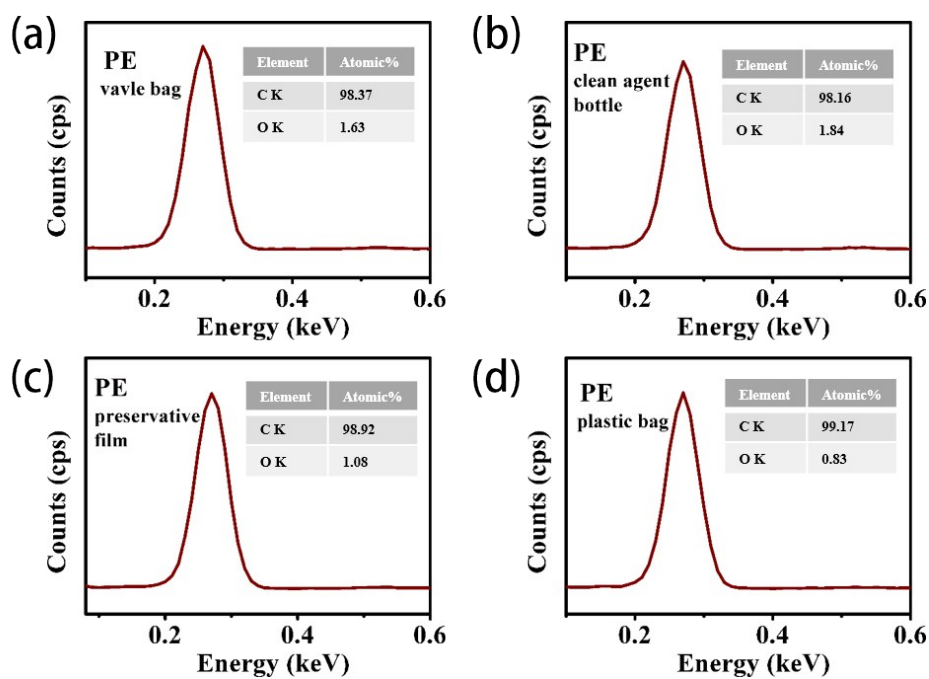

**Fig. S7.** EDS spectra of the GFs with different PE plastics as carbon sources. (a) PE (valve bag). (b) PE (clean agent bottle). (c) PE (preservative film). (d) PE (plastic bag).

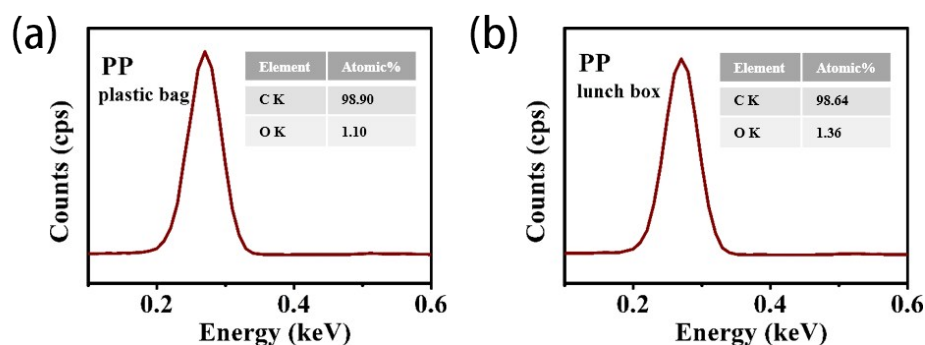

**Fig. S8.** EDS spectra of the GFs with different PP plastics as carbon sources. (a) PP (plastic bag). (b) PP (lunch box).

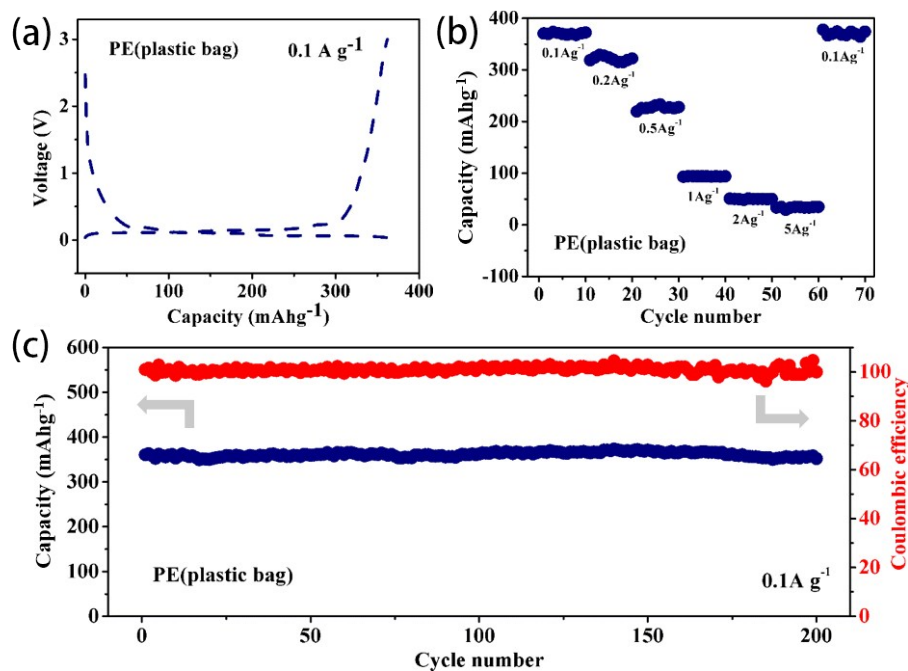

**Fig. S9.** Electrochemical performances of GF anode using PE (plastic bag) as raw material. (a) Discharge/charge voltage profiles of GF anode at current density of 0.1 A g<sup>-1</sup>. (b) Rate capability of the cell at various current rates from 0.1 to 5 A g<sup>-1</sup>. (c) Cycling performance and Coulombic efficiency of the GF anode at 0.1 A g<sup>-1</sup>.



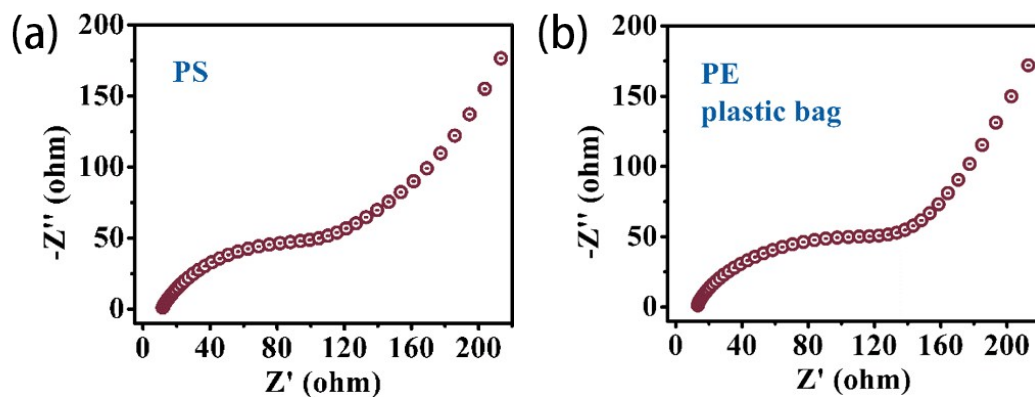

**Fig. S10.** Impedance spectra of half cells using the different carbon sources. (a) PS. (b) PE (plastic bag).

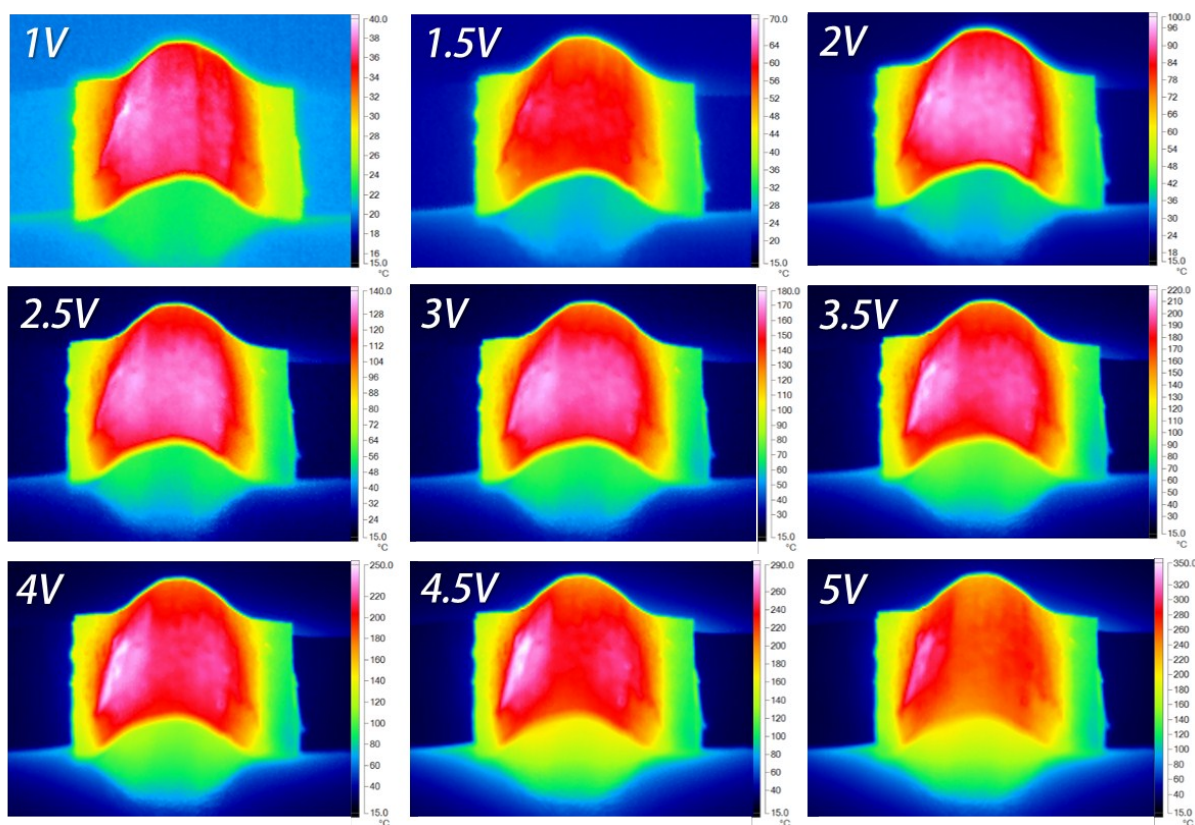

**Fig. S11.** Infrared pictures of the film with saturated temperature under different input voltages.

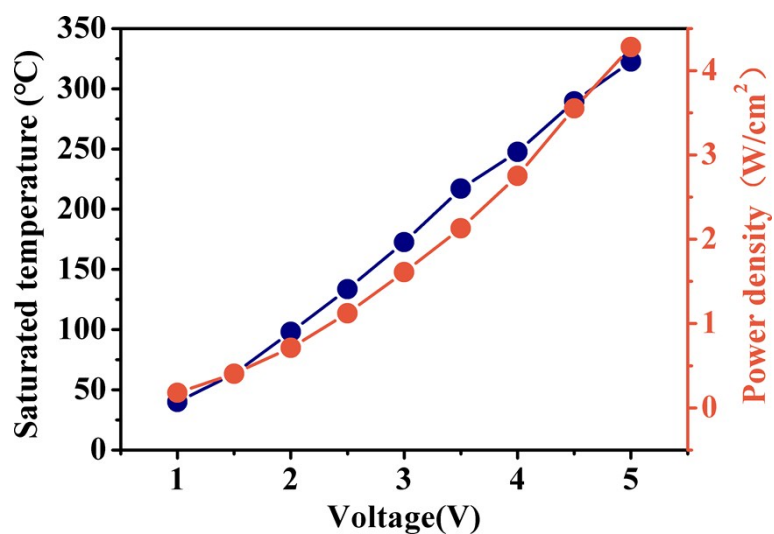

**Fig. S12.** Saturated temperature and input electrical power density as a function of input voltage.

**Table S1.** The amount of various carbon sources.

| Sample      | PET          | PE                    | PVC                  | PP             | PS             | PMMA         |
|-------------|--------------|-----------------------|----------------------|----------------|----------------|--------------|
| Amount (mg) | 500          | 250                   | 1000                 | 300            | 200            | 600          |
| Sample      | PE Valve bag | PE Clean agent bottle | PE Preservative film | PE Plastic bag | PP Plastic bag | PP Lunch box |
| Amount (mg) | 250          | 300                   | 250                  | 250            | 200            | 300          |

**Table S2.** Comparison of heat performances in this work with previous reported references related to graphene heaters.

|                                            | <b>Saturated<br/>temperature (°C)</b> | <b>Applied<br/>voltage (V)</b> | <b>Heating<br/>time (S)</b> | <b>Ref.</b> |
|--------------------------------------------|---------------------------------------|--------------------------------|-----------------------------|-------------|
| Graphene/glass                             | 80                                    | 40                             | ~120                        | 32          |
| Reduced graphene/quartz                    | 206                                   | 60                             | ~120                        | 33          |
| AuCl <sub>3</sub> -doped graphene/glass    | 110                                   | 12                             | ~300                        | 34          |
| Wet-spun graphene film/PI                  | 177                                   | 29                             | ~120                        | 35          |
| Carbon fiber felt/shape<br>memory polymers | 134                                   | 25                             | ~70                         | 36          |
| Fabrics of graphene fiber                  | 382                                   | 10                             | ~0.7                        | 37          |
| Graphene foil                              | 323                                   | 5                              | ~1 s                        | Our work    |
